# Supplementary material
Source: PubMed Central journal article supplement (PMC2039755)
Supplement: NIHMS31526-supplement-01.pdf [file NIHMS31526-supplement-01.pdf]

Supplemental Material:

Internet Appendix 1:

Example of matched acute and convalescent specimens with persistent trace antigenuria

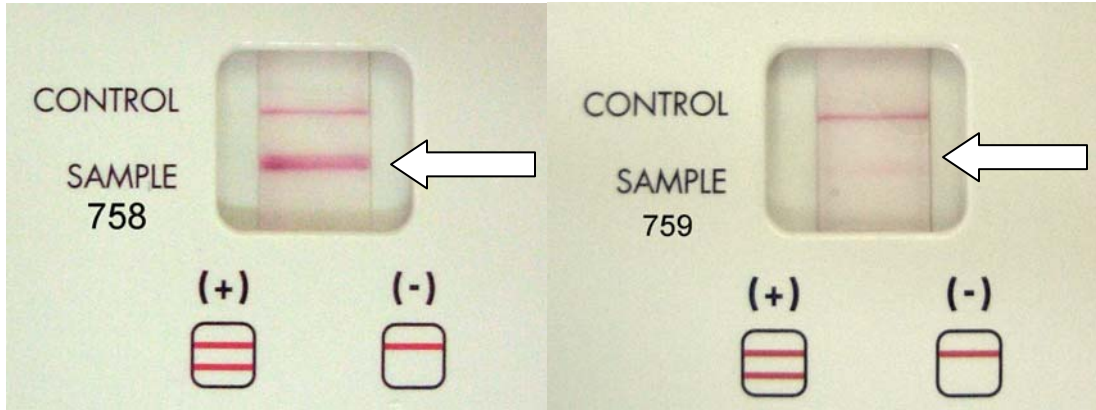

Acute

Convalescent

Strong Positive

Weak Positive
